# Supplementary material for: The persistence length of linear surfactants modulates the self-assembly of reverse micelles and their diffusion in nonpolar solvents
Source: Royal Society of Chemistry journal article supplement (doi:10.1039/d2me00113f), 2022-01-01
Supplement: d2me00113f1.pdf [file d2me00113f1.pdf]

**Supplementary Information for:**

**The persistence length of linear surfactants modulates the self - assembly  
of reverse micelles and their diffusion in nonpolar solvents**

J. D. Hernández Velázquez, J. Santos-Santos, A. Gama Goicochea<sup>1</sup>

Posgrado en Ingeniería Química, División de Ingeniería Química y Bioquímica,  
Tecnológico de Estudios Superiores de Ecatepec, Ecatepec de Morelos, Estado de México  
55210, Mexico

---

<sup>1</sup> Corresponding author. Email: armando\_gama@tese.edu.mx

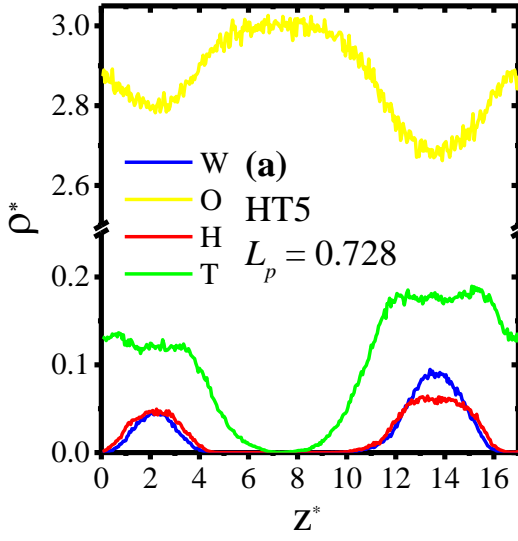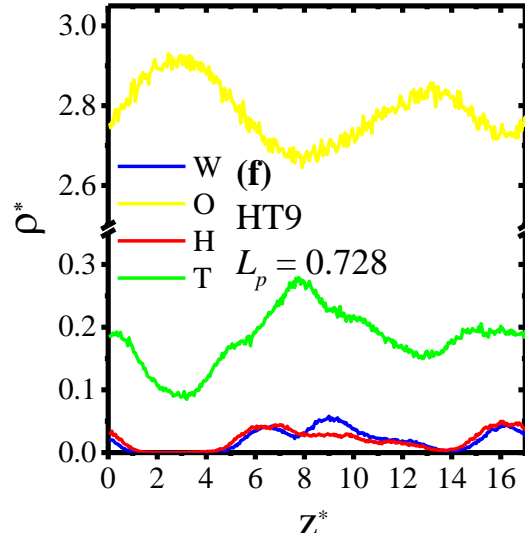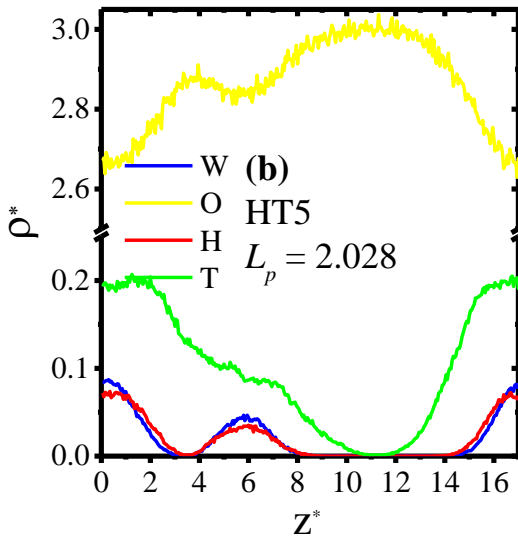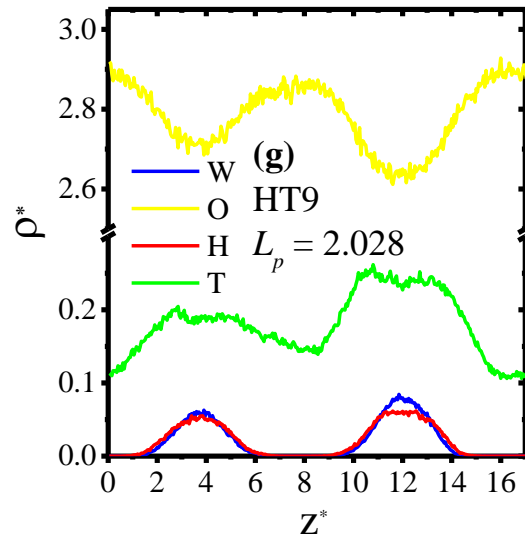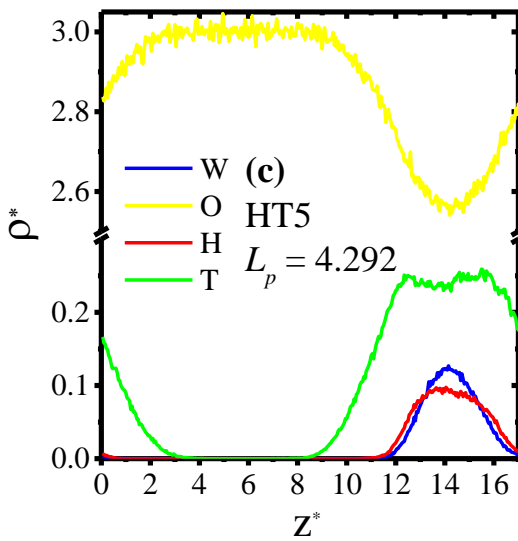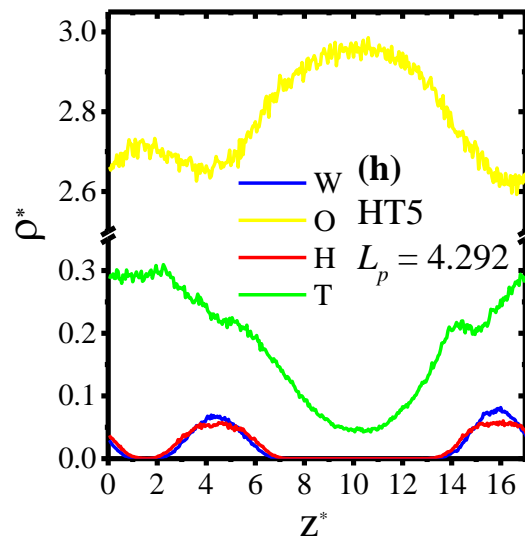

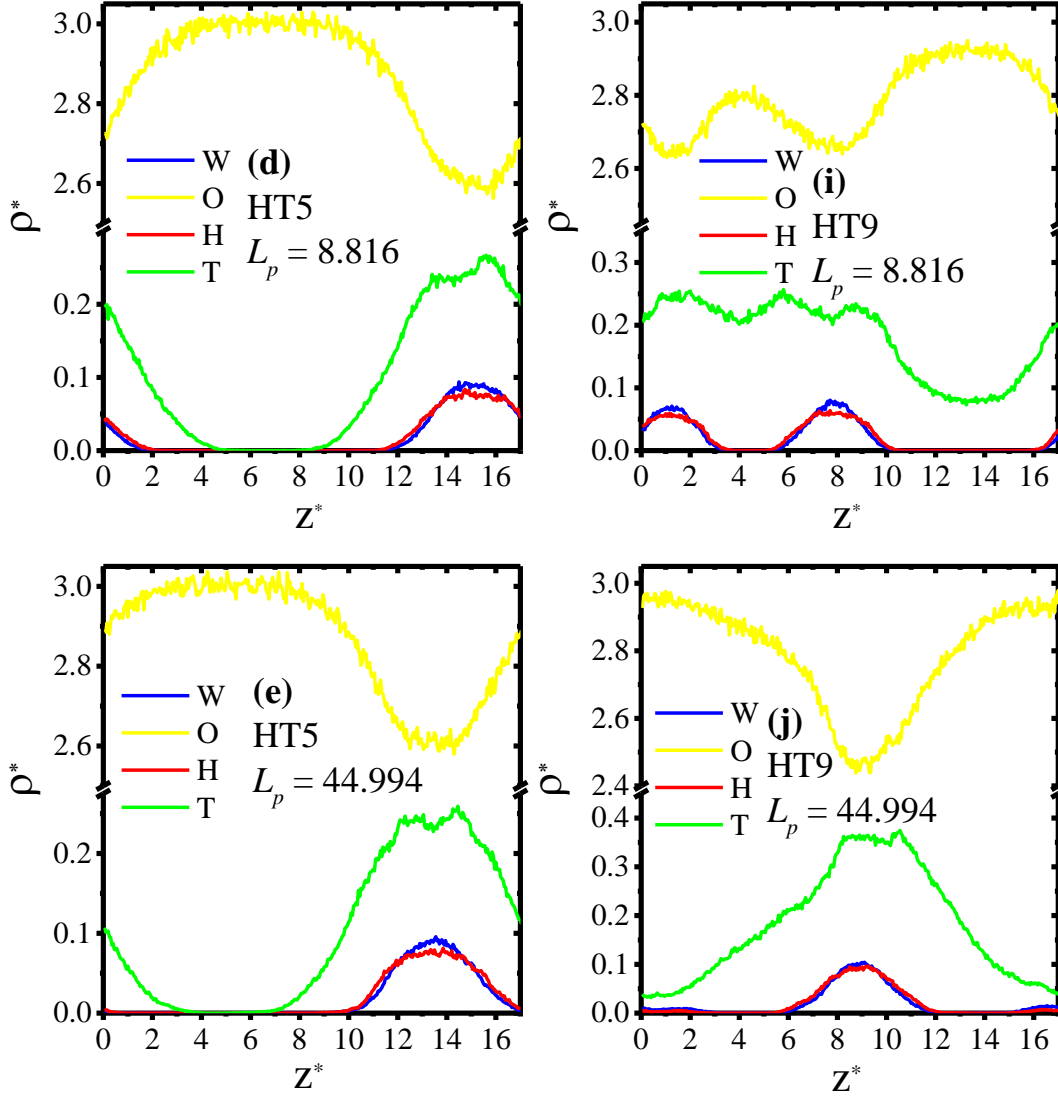

**Fig. S1.** Reduced density profiles of the last simulation block of the systems of surfactants HT5 (a-e) and HT9 (f-j) for each of the five different persistence length ( $L_p = 0.728, 2.028, 4.929, 8,816$  and  $44.994$ ). In the density profiles, the blue, yellow, red and green curves, refer to the water (W), oil (O), surfactant heads (H) and surfactant tails (T) species, respectively. The profiles are reported in DPD reduced units.

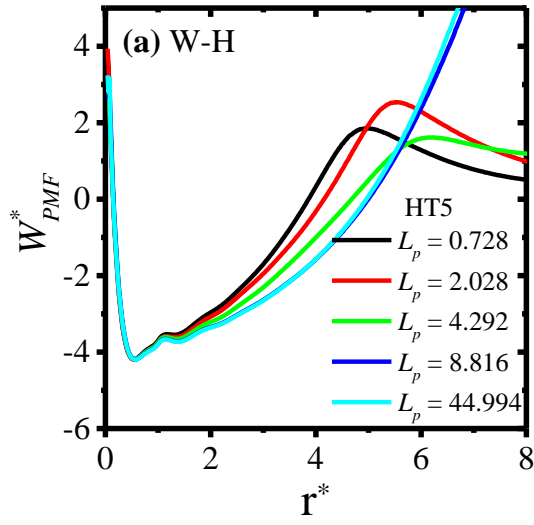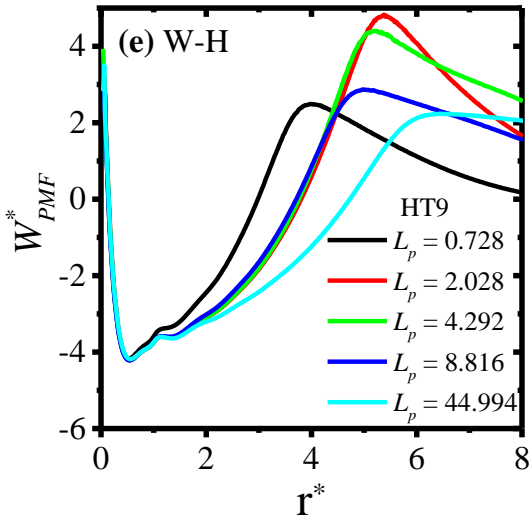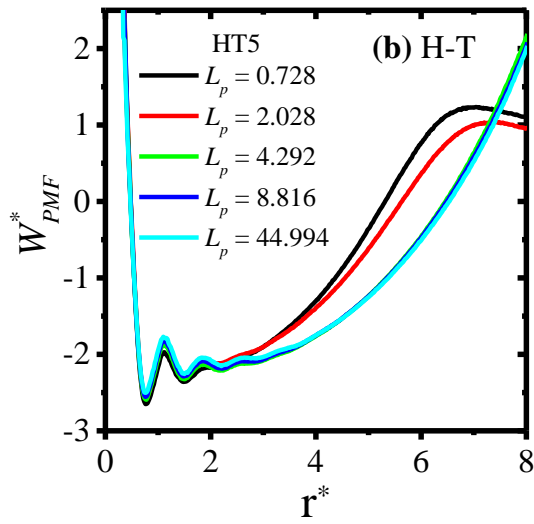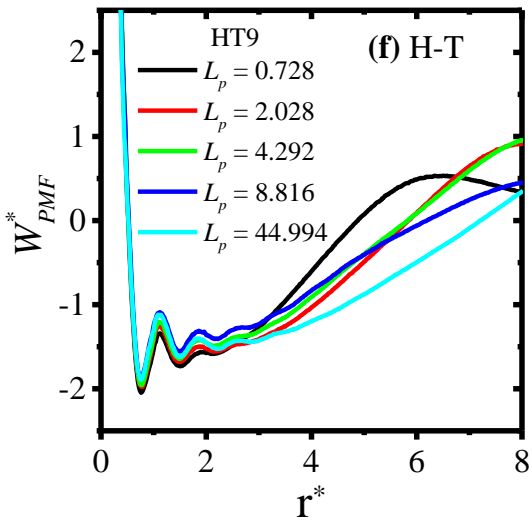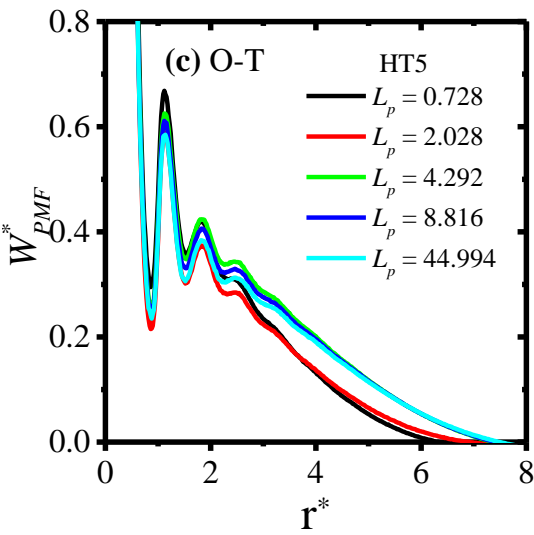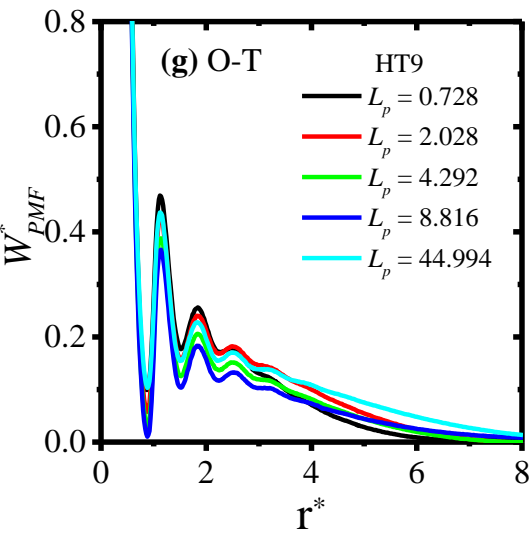

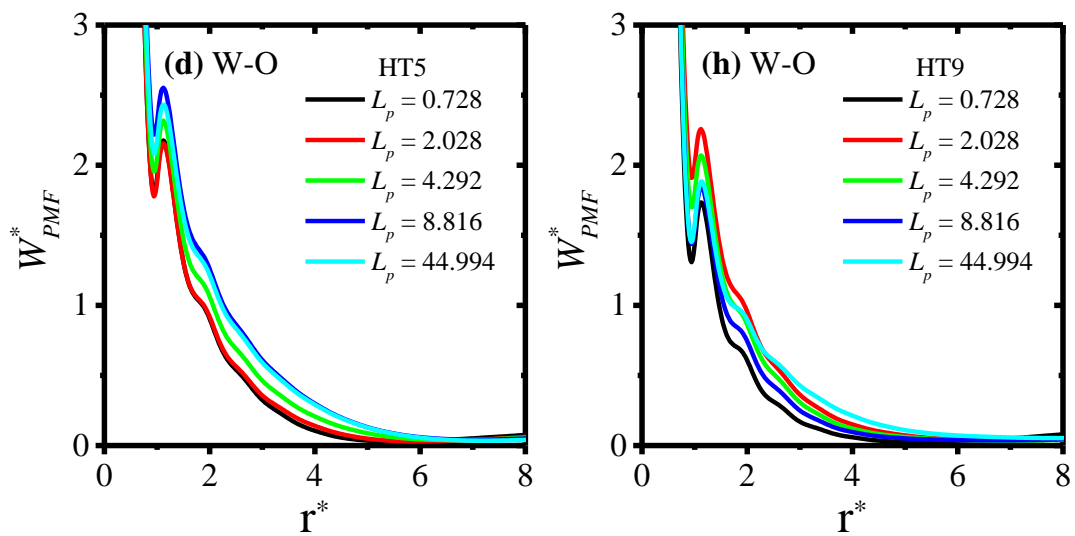

**Fig. S2.** Potentials of mean force ( $W_{PMF}^*$ ) between water-surfactants' heads (a, e), heads-tails (b, f), oil-tails (c, g) and water-oil particles (d, h) of the systems of HT5 (a-d) and HT9 surfactants (e-h) for each of the five different persistence length ( $L_p = 0.728, 2.028, 4.929, 8.816$  and  $44.994$ ; black, red, green, blue and cyan lines, respectively).
